# Supplementary material for: Towards electrospray-assisted production of lipid-based synthetic cell assemblies
Source: Soft Matter. 2025 Mar 4;21(16):2977–85. doi: 10.1039/d4sm01284d (PMC11878373; doi:10.1039/d4sm01284d)
Supplement: SM-021-D4SM01284D-s001 [file SM-021-D4SM01284D-s001.xlsx]

## Sheet: Figure 1c & S2
Dextran 150kDa 15wt%			Intermittent TC			TC			Unstable TC
needle-ring distance	0.2 cm		p (mbar)	Q (mL/h)	E (kV)	p (mbar)	Q (mL/h)	E (kV)	p (mbar)	Q (mL/h)	E (kV)
Pump	Syringe pump		N/A	0.25	2.91	N/A	0.25	3.15	N/A	0.25	4.15
			N/A	0.5	2.92	N/A	0.5	3.06	N/A	0.5	4.1
			N/A	1	2.9	N/A	1	3.16	N/A	1	4.25
			N/A	2	2.9	N/A	2	3.16	N/A	2	4.25
			N/A	3	2.89	N/A	3	3.21	N/A	3	4.27
			N/A	4	2.85	N/A	4	3.12	N/A	4	4.22
			N/A	5.5	2.8	N/A	5.5	3.07	N/A	5.5	4.18
			N/A	9.5	2.92	N/A	9.5	3.18	N/A	9.5	4.23
Dextran 100kDa 15wt%			Intermittent TC			TC			Unstable TC
needle-ring distance	0.5 cm		p (mbar)	Q (mL/h)	E (kV)	p (mbar)	Q (mL/h)	E (kV)	p (mbar)	Q (mL/h)	E (kV)
Pump	Elveflow pressure pump		25	0.1675	4.89	50	0.335	3.61	50	0.335	4.4
Calibration factor Q/p	0.0067		25	0.1675	3.09	150	1.005	3.65	150	1.005	4.42
			50	0.335	3.16	200	1.34	3.64	200	1.34	4.69
			150	1.005	3.16	300	2.01	3.78	300	2.01	4.72
			200	1.34	3.24
			300	2.01	3.25
Dextran 100kDa 15wt%			Intermittent TC			TC			Unstable TC
needle-ring distance	0.5 cm		p (mbar)	Q (mL/h)	E (kV)	p (mbar)	Q (mL/h)	E (kV)	p (mbar)	Q (mL/h)	E (kV)
Pump	Elveflow pressure pump		20	0.334	3.24	20	0.334	3.52	20	0.334	4.36
Calibration factor Q/p	0.0167		60	1.002	3.39	60	1.002	3.65	60	1.002	4.22
			100	1.67	3.31	100	1.67	3.62	100	1.67	4.2
Dextran 100kDa 15wt%			Intermittent TC			TC			Unstable TC
needle-ring distance	0.5 cm		p (mbar)	Q (mL/h)	E (kV)	p (mbar)	Q (mL/h)	E (kV)	p (mbar)	Q (mL/h)	E (kV)
Pump	Elveflow pressure pump		17	0.5848	3.29	17	0.5848	3.64	17	0.5848	4.18
Calibration factor Q/p	0.0344		30	1.032	3.35	30	1.032	3.6	30	1.032	4.25
			50	1.72	3.21	50	1.72	3.62	50	1.72	4.32
Calibration factors were calculated according to the procedure found in the ESI of Honaker et al. (2024). [1]
Reference [1]: L. W. Honaker, T.-N. Gao, K. R. de Graaf, T. V. Bogaardt, P. Vink, T. Stürzer, G. Kociok-Köhn, H. Zuilhof, F. M. Miloserdov, S. Deshpande, 2D and 3D Self-Assembly of Fluorine-Free Pillar-[5]-Arenes and Perfluorinated Diacids at All-Aqueous Interfaces. Adv. Sci. 2024, 11, 2401807. https://doi.org/10.1002/advs.202401807

## Sheet: Figure 1d
Entry	area	radius (um)	Calculated Diameter (um)
1	19766.2	79.3208	158.642
2	9720.88	55.626	111.252
3	53944.8	131.039	262.078
4	13060.3	64.4766	128.953
5	33191.6	102.787	205.574
6	36612.2	107.954	215.908
7	14696.2	68.3956	136.791
8	57662.8	135.479	270.959
9	15466.9	70.166	140.332
10	38045.3	110.046	220.093
11	38505	110.709	221.418
12	24701	88.6712	177.342
13	10653.8	58.234	116.468
14	15014	69.131	138.262
15	14419.1	67.7476	135.495
16	12364	62.7343	125.469
17	18130.3	75.9675	151.935
18	11410.9	60.2677	120.535
19	27161.7	92.983	185.966
20	14202.8	67.2375	134.475
21	31853.1	100.693	201.387
22	46535.8	121.708	243.416
23	29825.1	97.4353	194.871
24	12925.1	64.142	128.284
25	20462.5	80.7058	161.412
26	98973.2	177.494	354.988
27	32265.5	101.343	202.686
28	39444.6	112.052	224.104
29	28033.7	94.4638	188.928
30	5610.8	42.2608	84.5216
31	11485.2	60.4638	120.928
32	55073.7	132.403	264.806
33	11782.7	61.2417	122.483
34	22186.3	84.0365	168.073
35	29940	97.6228	195.246
36	11742.1	61.1362	122.272
37	9808.76	55.8769	111.754
38	16487.6	72.4443	144.889
39	31853.1	100.693	201.387
40	23639.7	86.7454	173.491
41	22889.4	85.3575	170.715
42	30758	98.9473	197.895
43	13891.8	66.4973	132.995
44	18934.8	77.6345	155.269
45	18096.5	75.8966	151.793
46	12134.2	62.1485	124.297
47	30163.1	97.9858	195.972
48	17846.4	75.3703	150.741
49	30169.9	97.9968	195.994
50	28168.9	94.6913	189.383
51	16088.8	71.5627	143.125
52	20989.8	81.739	163.478
53	12424.9	62.8885	125.777
54	8247.2	51.2364	102.473
55	15730.5	70.7614	141.523
56	10430.7	57.6211	115.242
57	14851.7	68.7564	137.513
58	50578.3	126.884	253.768
59	9403.16	54.7094	109.419
60	16190.2	71.7879	143.576
61	10484.8	57.7703	115.541
62	10200.8	56.9827	113.965
63	10795.7	58.6207	117.241
64	67742	146.843	293.686
65	10133.2	56.7936	113.587
66	15919.8	71.1859	142.372
67	77740	157.307	314.613
68	36463.4	107.734	215.469
69	6482.84	45.4263	90.8527
70	6557.2	45.6861	91.3722
71	15196.5	69.5499	139.1
72	36936.6	108.431	216.862
73	17542.2	74.7252	149.45
74	21807.8	83.3164	166.633
75	20347.6	80.4788	160.958
76	22896.1	85.3701	170.74
77	40688.4	113.805	227.61
78	11140.5	59.5493	119.099
79	12289.7	62.5454	125.091
80	9971	56.3371	112.674
81	6645.08	45.9912	91.9825
82	28033.7	94.4638	188.928
83	5610.8	42.2608	84.5216
84	30082	97.854	195.708
85	33563.4	103.361	206.723
86	15493.9	70.2273	140.455
87	33827	103.766	207.533
88	12303.2	62.5798	125.16
89	7510.36	48.894	97.788
90	15358.7	69.9202	139.84
91	7746.96	49.6582	99.3163
92	9403.16	54.7094	109.419
93	6462.56	45.3552	90.7105
94	13790.4	66.2542	132.508
95	12431.6	62.9056	125.811
96	47367.3	122.79	245.581
97	59298.7	137.388	274.775
98	33387.6	103.09	206.181
99	32299.3	101.396	202.792
100	38640.2	110.903	221.807
101	5225.48	40.7838	81.5677
102	6807.32	46.5493	93.0986
103	5374.2	41.3601	82.7203
104	17805.8	75.2846	150.569
105	40938.6	114.154	228.308
106	51173.2	127.628	255.256
107	9788.48	55.8191	111.638
108	13648.4	65.9123	131.825
109	29507.4	96.9149	193.83
110	19942	79.6727	159.345
111	8166.08	50.9838	101.968
112	11377.1	60.1784	120.357
113	35341.3	106.064	212.127
114	31968	100.875	201.75
115	40174.7	113.084	226.168
116	13121.2	64.6266	129.253
117	8368.88	51.613	103.226
118	11316.2	60.0173	120.035
119	54181.4	131.326	262.652
120	40789.8	113.947	227.893
121	12181.5	62.2696	124.539
122	6915.48	46.9176	93.8353
123	2028	25.4073	50.8147
124	18096.5	75.8966	151.793
125	25620.4	90.3063	180.613
126	9308.52	54.4334	108.867
127	9335.56	54.5124	109.025
128	9660.04	55.4517	110.903
129	25546	90.1751	180.35
130	11404.1	60.2498	120.5
131	8916.44	53.2747	106.549
132	14513.7	67.9696	135.939
133	7077.72	47.4648	94.9296
134	31853.1	100.693	201.387
135	12215.3	62.3559	124.712
136	52302.1	129.028	258.056
137	6557.2	45.6861	91.3722
138	10701.1	58.3632	116.726
139	20422	80.6258	161.252
140	33718.9	103.6	207.201
141	34401.6	104.644	209.288
142	12803.4	63.8393	127.679
143	7740.2	49.6365	99.273
144	28682.7	95.5509	191.102
145	9998.04	56.4134	112.827
146	29250.5	96.4921	192.984
147	31995.1	100.918	201.835
148	9707.36	55.5873	111.175
149	52194	128.895	257.789
150	6631.56	45.9444	91.8889
151	16169.9	71.7429	143.486
152	49686	125.76	251.52
153	11836.8	61.3821	122.764
154	26715.5	92.2161	184.432
155	6144.84	44.2263	88.4525
156	7023.64	47.2831	94.5663
157	2785.12	29.7747	59.5493
158	7611.76	49.2229	98.4459
159	6198.92	44.4205	88.8409
160	6462.56	45.3552	90.7105
161	9207.12	54.1361	108.272
162	3758.56	34.5888	69.1776
163	17244.8	74.089	148.178
164	30196.9	98.0407	196.081
165	8990.8	53.4964	106.993
166	41972.8	115.587	231.174
167	14892.3	68.8503	137.701
168	50909.6	127.299	254.598
169	6029.92	43.8108	87.6215
170	8287.76	51.3622	102.724
171	7348.12	48.363	96.726
172	12512.8	63.1105	126.221
173	24457.7	88.2333	176.467
174	8889.4	53.1938	106.388
175	22747.4	85.0924	170.185
176	37876.3	109.802	219.603
177	5286.32	41.0206	82.0412
178	18711.7	77.1759	154.352
179	7037.16	47.3286	94.6572
180	41263	114.606	229.211
181	11066.1	59.3503	118.701
182	23666.8	86.795	173.59
183	18360.2	76.4475	152.895
184	29960.3	97.6559	195.312
185	10146.8	56.8315	113.663
186	41972.8	115.587	231.174
187	22808.2	85.2062	170.412
188	24288.7	87.928	175.856
189	28074.3	94.5321	189.064
190	9687.08	55.5292	111.058
191	17758.5	75.1845	150.369
192	35740.1	106.66	213.321
193	4495.4	37.8276	75.6553
194	9031.36	53.6169	107.234
195	13945.9	66.6267	133.253
196	6246.24	44.5897	89.1794
197	13175.2	64.7596	129.519
198	11938.2	61.6444	123.289
199	8686.6	52.5836	105.167
200	20063.7	79.9154	159.831
201	15683.2	70.6549	141.31
202	55878.2	133.366	266.733
203	20888.4	81.5413	163.083
204	11593.4	60.7478	121.496
205	12533	63.1616	126.323
206	19522.9	78.831	157.662
207	12228.8	62.3904	124.781
208	14763.8	68.5527	137.105
209	23274.7	86.073	172.146
210	6956.04	47.055	94.1101
211	26309.9	91.5134	183.027
212	25917.8	90.829	181.658
213	11451.4	60.3747	120.749
214	13100.9	64.5766	129.153
215	8395.92	51.6963	103.393
216	4961.84	39.7417	79.4834
217	40039.5	112.894	225.787
218	30136.1	97.9419	195.884
219	16460.6	72.3849	144.77
220	25133.7	89.4444	178.889
221	1595.36	22.5348	45.0697
222	8686.6	52.5836	105.167
223	11938.2	61.6444	123.289
224	22348.6	84.3432	168.686
225	21280.5	82.303	164.606
226	34016.3	104.056	208.113
227	11018.8	59.2232	118.446
228	7294.04	48.1847	96.3694
229	40512.7	113.559	227.117
230	9504.56	55.0036	110.007
231	7476.56	48.7838	97.5677
232	3467.88	33.2244	66.4488
233	16142.9	71.6829	143.366
234	13662	65.945	131.89
235	5624.32	42.3117	84.6233
236	45954.5	120.945	241.891
237	9484.28	54.9449	109.89
238	18907.7	77.5791	155.158
239	23666.8	86.795	173.59
240	7280.52	48.14	96.28
241	23335.5	86.1854	172.371
242	6956.04	47.055	94.1101
243	23274.7	86.073	172.146
244	14763.8	68.5527	137.105
245	2447.12	27.9095	55.8191
246	8997.56	53.5165	107.033
247	4928.04	39.6061	79.2122
248	9193.6	54.0963	108.193
249	12999.5	64.3262	128.652
250	4752.28	38.8934	77.7868
251	7300.8	48.207	96.414
252	6577.48	45.7567	91.5134
253	6496.36	45.4737	90.9474
254	4529.2	37.9696	75.9392
255	2325.44	27.2068	54.4136
256	13249.6	64.9421	129.884
257	13864.8	66.4326	132.865
258	11485.2	60.4638	120.928
259	11485.2	60.4638	120.928
260	11221.6	59.7658	119.532
261	14338	67.5567	135.113
262	4603.56	38.28	76.56
263	4738.76	38.8381	77.6761
264	24937.6	89.0949	178.19
265	4914.52	39.5517	79.1035
266	34239.4	104.397	208.794
267	7753.72	49.6798	99.3597
268	26323.4	91.5369	183.074
269	9788.48	55.8191	111.638
270	9883.12	56.0883	112.177
271	4461.6	37.6852	75.3703
272	10694.3	58.3447	116.689
273	4421.04	37.5135	75.0269
274	14770.6	68.5684	137.137
275	19833.8	79.4563	158.913
276	7888.92	50.1111	100.222
277	22882.6	85.3449	170.69
278	14905.8	68.8815	137.763
279	24890.3	89.0103	178.021
280	9423.44	54.7684	109.537
281	9883.12	56.0883	112.177
282	1061.32	18.3801	36.7602
283	9267.96	54.3147	108.629
284	9835.8	55.9538	111.908
285	8760.96	52.8081	105.616
286	5705.44	42.6157	85.2314
287	3244.8	32.138	64.276
288	9443.72	54.8273	109.655
289	4846.92	39.2788	78.5576
290	30420	98.4022	196.804
291	25295.9	89.7326	179.465
292	21314.3	82.3684	164.737
293	24619.9	88.5255	177.051
294	35882.1	106.872	213.744
295	21510.3	82.7463	165.493
296	7496.84	48.85	97.6999
297	10755.2	58.5105	117.021
298	10592.9	58.0675	116.135
299	6442.28	45.284	90.568
300	17873.4	75.4274	150.855
301	5320.12	41.1515	82.303
302	7990.32	50.4321	100.864
303	12864.3	63.9908	127.982
304	17630.1	74.9121	149.824
305	12931.9	64.1588	128.318
306	14885.5	68.8346	137.669
307	11045.8	59.2959	118.592
308	10200.8	56.9827	113.965
309	44798.5	119.414	238.829
310	31407	99.9857	199.971
311	26323.4	91.5369	183.074
312	13452.4	65.4372	130.874
313	8875.88	53.1534	106.307
314	28574.5	95.3706	190.741
315	6989.84	47.1692	94.3384
316	34996.5	105.545	211.09
317	11728.6	61.101	122.202
318	20787	81.3431	162.686
319	16413.3	72.2808	144.562
320	5725.72	42.6914	85.3827
321	17981.6	75.6553	151.311
322	16041.5	71.4574	142.915
323	5211.96	40.731	81.4621
324	32258.7	101.332	202.665
325	8118.76	50.8358	101.672
326	42141.8	115.82	231.639
327	9335.56	54.5124	109.025
328	22409.4	84.4579	168.916
329	44244.2	118.673	237.347
330	13574.1	65.7325	131.465
331	9065.16	53.7171	107.434
332	9355.84	54.5716	109.143
333	10085.9	56.6608	113.322
334	50564.8	126.867	253.734
335	38106.1	110.134	220.269
336	15237	69.6427	139.285
337	10849.8	58.7673	117.535
338	16575.5	72.6371	145.274
339	5800.08	42.9677	85.9354
340	12573.6	63.2637	126.527
341	2325.44	27.2068	54.4136
342	15676.4	70.6397	141.279
343	20388.2	80.559	161.118
344	22497.3	84.6233	169.247
345	13858	66.4164	132.833
346	19232.2	78.2419	156.484
347	46887.4	122.167	244.333
348	9362.6	54.5913	109.183
349	32008.6	100.939	201.878
350	13553.8	65.6834	131.367
351	14817.9	68.6782	137.356
352	12404.6	62.8371	125.674
353	23741.1	86.9312	173.862
354	10207.6	57.0016	114.003
355	15676.4	70.6397	141.279
356	6097.52	44.0557	88.1113
357	46522.3	121.69	243.38
358	12729.1	63.6537	127.307
359	13925.6	66.5782	133.156
360	6841.12	46.6647	93.3294
361	8301.28	51.4041	102.808
362	8483.8	51.9661	103.932
363	13831	66.3516	132.703
364	9349.08	54.5519	109.104
365	11843.5	61.3996	122.799
366	34219.1	104.366	208.732
367	52518.4	129.295	258.59
368	35064.1	105.647	211.294
369	35097.9	105.698	211.396
370	10207.6	57.0016	114.003
371	20408.4	80.5991	161.198
372	9754.68	55.7226	111.445
373	59454.2	137.568	275.135
374	28324.4	94.9523	189.905
375	20394.9	80.5724	161.145
376	32819.8	102.21	204.42
377	18745.5	77.2455	154.491
378	14020.2	66.804	133.608
379	12972.4	64.2593	128.519
380	20131.3	80.0499	160.1
381	7442.76	48.6734	97.3469
382	17623.3	74.8978	149.796
383	27648.4	93.8124	187.625
384	36517.5	107.814	215.628
385	18806.3	77.3708	154.742
386	16521.4	72.5185	145.037
387	19860.9	79.5105	159.021
388	19556.7	78.8992	157.798
389	44710.6	119.297	238.595
390	15183	69.519	139.038
391	1811.68	24.0141	48.0281
392	15203.2	69.5654	139.131
393	22612.2	84.8392	169.678
394	29399.2	96.7371	193.474
395	35997	107.043	214.086
396	38065.6	110.076	220.151
397	39796.1	112.55	225.1
398	57331.6	135.09	270.179
399	13364.5	65.2231	130.446
400	39688	112.397	224.794
401	8808.28	52.9506	105.901
402	67437.8	146.513	293.026
403	8510.84	52.0489	104.098
404	2933.84	30.5593	61.1186
405	15906.3	71.1556	142.311
406	22456.7	84.547	169.094
407	22950.2	85.4709	170.942
408	9011.08	53.5567	107.113
409	27601.1	93.732	187.464
410	5448.56	41.6453	83.2906
411	5245.76	40.8629	81.7258

## Sheet: Figure 3b inset
Distance (µm)	Intensity
0	183.75
0.65	185.725
1.3	185.124
1.95	181.427
2.6	183.414
3.25	184.708
3.9	187.729
4.55	185.864
5.2	191.126
5.85	184.103
6.5	188.676
7.15	186.17
7.8	193.014
8.45	193.068
9.1	185.877
9.75	188.747
10.4	193.057
11.05	196.314
11.7	195.96
12.35	190.124
13	190.523
13.65	190.839
14.3	190.702
14.95	198.857
15.6	196.726
16.25	194.902
16.9	191.142
17.55	201.261
18.2	200.043
18.85	195.395
19.5	191.973
20.15	201.141
20.8	200.316
21.45	202.989
22.1	203.655
22.75	203.658
23.4	203.458
24.05	205.405
24.7	198.614
25.35	201.738
26	205.571
26.65	206.178
27.3	199.376
27.95	204.949
28.6	208.881
29.25	208.654
29.9	211.881
30.55	212.376
31.2	207.478
31.85	211.396
32.5	214.479
33.15	216.451
33.8	222.842
34.45	225.252
35.1	216.293
35.75	223.477
36.4	217.054
37.05	219.254
37.7	218.425
38.35	224.14
39	228.597
39.65	231.788
40.3	229.796
40.95	227.054
41.6	227.529
42.25	231.736
42.9	232.339
43.55	236.768
44.2	240.201
44.85	246.323
45.5	244.65
46.15	240.598
46.8	251.766
47.45	259.198
48.1	263.792
48.75	249.524
49.4	268.261
50.05	269.221
50.7	280.161
51.35	288.792
52	303.489
52.65	326.46
53.3	334.349
53.95	335.537
54.6	377.896
55.25	472.616
55.9	582.008
56.55	694.407
57.2	771.352
57.85	760.654
58.5	617.169
59.15	487.059
59.8	422.113
60.45	393.387
61.1	368.871
61.75	339.687
62.4	319.547
63.05	317.257
63.7	309.992
64.35	319.523
65	309.146
65.65	301.926
66.3	298.617
66.95	296.624
67.6	305.542
68.25	306.675
68.9	305.974
69.55	296.916
70.2	312.096
70.85	305.291
71.5	316.425
72.15	314.893
72.8	310.708
73.45	314.769
74.1	316.499
74.75	317.066
75.4	333.756
76.05	326.508
76.7	326.406
77.35	333.827
78	339.661
78.65	330.095
79.3	329.191
79.95	337.902
80.6	346.216
81.25	340.659
81.9	346.243
82.55	362.221
83.2	353.474
83.85	356.122
84.5	359.62
85.15	361.531
85.8	363.698
86.45	381.011
87.1	373.513
87.75	378.709
88.4	374.676
89.05	386.85
89.7	388.653
90.35	386.588
91	390.83
91.65	400.378
92.3	414.04
92.95	415.748
93.6	417.623
94.25	427.718
94.9	442.649
95.55	450.909
96.2	461.989
96.85	485.121
97.5	505.949
98.15	527.078
98.8	543.836
99.45	555.967
100.1	556.239
100.75	566.923
101.4	578.117
102.05	592.104
102.7	600.438
103.35	615.314
104	640.685
104.65	645.58
105.3	659.811
105.95	664.361
106.6	690.036
107.25	734.264
107.9	766.442
108.55	789.472
109.2	810.201
109.85	843.807
110.5	881.134
111.15	907.414
111.8	936.076
112.45	995.326
113.1	1034.4
113.75	1065.13
114.4	1104.32
115.05	1132.68
115.7	1143.78
116.35	1167.3
117	1204.63
117.65	1240.68
118.3	1265.16
118.95	1291.6
119.6	1304.47
120.25	1307.85
120.9	1339.34
121.55	1362.67
122.2	1360.12
122.85	1349.65
123.5	1380.13
124.15	1391.62
124.8	1433.84
125.45	1468.29
126.1	1514.17
126.75	1580.34
127.4	1631
128.05	1652.91
128.7	1702.71
129.35	1754.38
130	1776.76
130.65	1801.73
131.3	1815.96
131.95	1803.08
132.6	1828.32
133.25	1814.53
133.9	1774.66
134.55	1780.87
135.2	1765.23
135.85	1756.8
136.5	1792.47
137.15	1833.7
137.8	1865.35
138.45	1942.97
139.1	2016.56
139.75	2042.23
140.4	2047
141.05	2046.92
141.7	2047
142.35	2047
143	2047
143.65	2047
144.3	2047
144.95	2047
145.6	2047
146.25	2047
146.9	2047
147.55	2047
148.2	2047
148.85	2047
149.5	2047
150.15	2047
150.8	2047
151.45	2047
152.1	2047
152.75	2047
153.4	2047
154.05	2047
154.7	2047
155.35	2047
156	2047
156.65	2047
157.3	2047
157.95	2047
158.6	2047
159.25	2047
159.9	2047
160.55	2047
161.2	2047
161.85	2047
162.5	2047
163.15	2047
163.8	2047
164.45	2047
165.1	2047
165.75	2047
166.4	2047
167.05	2047
167.7	2047
168.35	2047
169	2047
169.65	2047
170.3	2047
170.95	2047
171.6	2047
172.25	2047
172.9	2040.59
173.55	2019.63
174.2	1969.73
174.85	1906.43
175.5	1852
176.15	1816.95
176.8	1756.82
177.45	1673.44
178.1	1692.29
178.75	1678.91
179.4	1668.5
180.05	1652.78
180.7	1649.6
181.35	1610.02
182	1583.3
182.65	1566.83
183.3	1557.84
183.95	1558.73
184.6	1547.94
185.25	1531.54
185.9	1557.81
186.55	1556.42
187.2	1560.41
187.85	1587.97
188.5	1619.39
189.15	1614.75
189.8	1613.45
190.45	1616.1
191.1	1596.31
191.75	1621.35
192.4	1621.24
193.05	1638.48
193.7	1632.33
194.35	1647.69
195	1642.43
195.65	1643.17
196.3	1630.44
196.95	1627.4
197.6	1614.84
198.25	1590.16
198.9	1572.61
199.55	1565.94
200.2	1540.77
200.85	1503.65
201.5	1474.74
202.15	1480.6
202.8	1458.16
203.45	1455.36
204.1	1457.07
204.75	1488.02
205.4	1509.4
206.05	1534.73
206.7	1527.31
207.35	1479.56
208	1505.13
208.65	1486.9
209.3	1463.13
209.95	1468.33
210.6	1463.08
211.25	1468.96
211.9	1455.73
212.55	1464.85
213.2	1470.72
213.85	1495.31
214.5	1495.06
215.15	1493.07
215.8	1479.16
216.45	1445.49
217.1	1426.26
217.75	1398.18
218.4	1387.52
219.05	1375.83
219.7	1338.69
220.35	1332.04
221	1353.64
221.65	1349.23
222.3	1309.02
222.95	1280.44
223.6	1267.42
224.25	1241.74
224.9	1209.89
225.55	1186.58
226.2	1159.12
226.85	1149.06
227.5	1180.87
228.15	1142.23
228.8	1152.32
229.45	1155.4
230.1	1169.39
230.75	1168.46
231.4	1184.56
232.05	1215.97
232.7	1226.66
233.35	1230.46
234	1247.74
234.65	1243.69
235.3	1242.31
235.95	1238.36
236.6	1232.3
237.25	1249.48
237.9	1256.5
238.55	1248.83
239.2	1234.92
239.85	1231.59
240.5	1188.56
241.15	1184.06
241.8	1156.85
242.45	1116.89
243.1	1100.87
243.75	1061.87
244.4	1046.23
245.05	1045.07
245.7	1042.71
246.35	1025.49
247	1024
247.65	1003.67
248.3	997.541
248.95	993.347
249.6	1014.65
250.25	982.909
250.9	975.092
251.55	959.322
252.2	950.26
252.85	944.525
253.5	943.683
254.15	917.384
254.8	915.324
255.45	893.802
256.1	874.26
256.75	851
257.4	859.178
258.05	866.035
258.7	862.761
259.35	872.561
260	863.854
260.65	868.107
261.3	871.47
261.95	868.488
262.6	872.56
263.25	882.662
263.9	899.984
264.55	908.545
265.2	921.873
265.85	925.66
266.5	930.485
267.15	944.202
267.8	927.657
268.45	912.898
269.1	922.508
269.75	898.705
270.4	897.058
271.05	899.978
271.7	885.276
272.35	886.417
273	876.896
273.65	867.257
274.3	860.264
274.95	863.246
275.6	879.652
276.25	842.596
276.9	860.071
277.55	857.541
278.2	858.338
278.85	851.658
279.5	848.511
280.15	831.339
280.8	817.388
281.45	798.465
282.1	801.077
282.75	806.543
283.4	784.379
284.05	782.079
284.7	788.126
285.35	795.694
286	811.092
286.65	814.443
287.3	818.185
287.95	825.854
288.6	847.021
289.25	838.981
289.9	833.917
290.55	837.31
291.2	839.866
291.85	810.811
292.5	811.171
293.15	802.52
293.8	822.367
294.45	836.714
295.1	852.364
295.75	859.801
296.4	868.085
297.05	887.412
297.7	905.83
298.35	933.893
299	958.407
299.65	964.912
300.3	981.043
300.95	1000.73
301.6	1010.26
302.25	1059.86
302.9	1074.83
303.55	1105.38
304.2	1123.13
304.85	1118.6
305.5	1101.38
306.15	1084.73
306.8	1118.92
307.45	1054.69
308.1	1041.4
308.75	1029.32
309.4	1010.17
310.05	1022.2
310.7	1034.17
311.35	1053.36
312	1076.64
312.65	1108.34
313.3	1110.1
313.95	1130.29
314.6	1135.55
315.25	1145.84
315.9	1155.23
316.55	1150.49
317.2	1177.49
317.85	1187.99
318.5	1199.76
319.15	1202.74
319.8	1183.25
320.45	1215.89
321.1	1216.46
321.75	1213.44
322.4	1191.74
323.05	1170.14
323.7	1180.45
324.35	1188.92
325	1173.99
325.65	1166.52
326.3	1183.71
326.95	1181.34
327.6	1182.62
328.25	1166.93
328.9	1138.14
329.55	1118.78
330.2	1099.59
330.85	1092.72
331.5	1057.24
332.15	1018.32
332.8	969.793
333.45	930.688
334.1	905.533
334.75	869.113
335.4	846.395
336.05	829.8
336.7	790.653
337.35	763.493
338	750.443
338.65	752.335
339.3	748.08
339.95	743.617
340.6	738.487
341.25	743.441
341.9	732.172
342.55	725.242
343.2	718.94
343.85	699.97
344.5	666.919
345.15	633.988
345.8	619.066
346.45	614.073
347.1	610.132
347.75	598.449
348.4	589.914
349.05	579.653
349.7	554.154
350.35	529.326
351	512.085
351.65	496.836
352.3	481.404
352.95	452.324
353.6	435.15
354.25	432.395
354.9	418.893
355.55	405.335
356.2	388.603
356.85	381.538
357.5	362.295
358.15	354.758
358.8	336.365
359.45	310.406
360.1	301.136
360.75	290.557
361.4	283.005
362.05	271.981
362.7	262.942
363.35	256.35
364	251.57
364.65	250.315
365.3	234.747
365.95	240.875
366.6	238.584
367.25	238.14
367.9	232.407
368.55	228.391
369.2	224.849
369.85	222.539
370.5	226.075
371.15	221.988
371.8	213.382
372.45	211.398
373.1	210.552
373.75	213.32
374.4	214.944
375.05	221.608
375.7	220.211
376.35	217.413
377	219.199
377.65	220.585
378.3	216.904
378.95	216.292
379.6	215.476
380.25	214.903
380.9	215.256
381.55	214.817
382.2	217.226
382.85	219.003
383.5	225.227
384.15	227.741
384.8	227.036
385.45	226.132
386.1	233.434
386.75	250.403
387.4	255.157
388.05	259.159
388.7	285.117
389.35	334.992
390	403.195
390.65	478.286
391.3	593.323
391.95	798.108
392.6	818.644
393.25	654.374
393.9	465.937
394.55	401.96
395.2	372.548
395.85	351.328
396.5	336.544
397.15	325.714
397.8	283.572
398.45	265.971
399.1	251.695
399.75	243.523
400.4	234.028
401.05	221.174
401.7	207.351
402.35	202.705
403	202.463
403.65	208.409
404.3	197.364
404.95	201.199
405.6	193.759
406.25	189.469
406.9	189.576
407.55	188.249
408.2	192.097
408.85	190.372
409.5	183.693
410.15	178.741
410.8	177.856
411.45	179.738
412.1	180.262
412.75	182.638
413.4	182.44
414.05	179.837
414.7	172.306
415.35	182.851
416	183.047
416.65	178.346
417.3	175.972
417.95	173.479
418.6	182.21
419.25	179.365
419.9	171.453
420.55	170.796
421.2	171.75
421.85	175.234
422.5	175.979
423.15	170.207
423.8	166.439
424.45	165.126
425.1	173.141
425.75	167.459
426.4	169.213
427.05	168.672
427.7	167.735
428.35	169.215
429	166.979
429.65	162.947
430.3	163.81
430.95	163.894
431.6	162.997
432.25	167.842
432.9	168.072
433.55	165.748
434.2	167.976
434.85	167.25

## Sheet: Figure 4c
1 minute
droplet	area	mean intensity	mean total intensity	standard deviation
1	840910	430.971	292.58	58.51
2	169189	242.889	1	0.19998	normalized
3	267588	300.31
4	331862	334.81
5	234139	303.955
6	235316	263.812
7	280919	288.32
8	413090	370.217
9	226501	326.611
10	178870	253.002
11	175652	257.833
12	103969	233.054
13	212453	277.312
14	104023	213.024
30 minutes			mean total intensity	standard deviation
1	840910	161.292	157.268	7.38349
2	169189	151.027	0.537523	0.0252358	normalized
3	267588	158.07
4	331862	159.057
5	234139	144.416
6	235316	143.862
7	280919	157.093
8	413090	162.012
9	226501	162.898
10	178870	171.387
11	175652	158.435
12	103969	162.381
13	212453	157.429
14	104023	152.398

## Sheet: Figure 4d
Measurement A
	Bleached	Unbleached
Frame	mean_I(t)	mean_R(t)	C(t)	Icorrect(t)	Icorrect(0)	min_Icorrect(t)	Inorm(t)	Time (s)
1	61.363	42.604	1	61.363	63.2415	24.7943	0.951141	3.89
2	63.05	42.475	1.00304	63.2415	63.2415	24.7943	1	7.78
3	23.486	40.356	1.0557	24.7943	63.2415	24.7943	0	11.67						Time (s)	A	B	mean fluorescence intensity
4	22.762	38.731	1.1	25.0381	63.2415	24.7943	0.00634302	15.56						3.89	0.951141	1	0.975571
5	23.956	39.541	1.07746	25.8117	63.2415	24.7943	0.0264637	19.45						7.78	1	0.886489	0.943245
6	24.179	40.478	1.05252	25.4489	63.2415	24.7943	0.0170277	23.34						11.67	0	0	0
7	25.137	39.392	1.08154	27.1867	63.2415	24.7943	0.0622252	27.23						15.56	0.00634302	0.021879	0.014111
8	25.095	39.24	1.08573	27.2464	63.2415	24.7943	0.0637782	31.12						19.45	0.0264637	0.0292362	0.0278499
9	23.661	40.545	1.05078	24.8626	63.2415	24.7943	0.00177669	35.01						23.34	0.0170277	0.0421768	0.0296022
10	22.977	38.712	1.10054	25.287	63.2415	24.7943	0.0128169	38.9						27.23	0.0622252	0.0925566	0.0773909
11	24.501	40.248	1.05854	25.9352	63.2415	24.7943	0.0296757	42.79						31.12	0.0637782	0.15237	0.108074
12	23.735	39.806	1.07029	25.4034	63.2415	24.7943	0.0158421	46.68						35.01	0.00177669	0.151917	0.0768469
13	25.533	37.373	1.13997	29.1068	63.2415	24.7943	0.112167	50.57						38.9	0.0128169	0.175665	0.094241
14	23.432	38.341	1.11119	26.0373	63.2415	24.7943	0.0323314	54.46						42.79	0.0296757	0.0402545	0.0349651
15	25.312	37.827	1.12629	28.5085	63.2415	24.7943	0.0966069	58.35						46.68	0.0158421	0.0620914	0.0389668
16	23.629	37.939	1.12296	26.5344	63.2415	24.7943	0.0452611	62.24						50.57	0.112167	0.0878147	0.099991
17	25.187	38.947	1.0939	27.552	63.2415	24.7943	0.0717272	66.13						54.46	0.0323314	0.12249	0.0774105
18	24.091	39.535	1.07763	25.9611	63.2415	24.7943	0.0303495	70.02						58.35	0.0966069	0.164143	0.130375
19	24.242	38.813	1.09767	26.6098	63.2415	24.7943	0.0472214	73.91						62.24	0.0452611	0.0960267	0.0706439
20	24.903	38.408	1.10925	27.6236	63.2415	24.7943	0.0735901	77.8						66.13	0.0717272	0.152048	0.111888
21	24.745	37.857	1.12539	27.8478	63.2415	24.7943	0.0794226	81.69						70.02	0.0303495	0.108916	0.0696326
22	23.935	38.303	1.11229	26.6226	63.2415	24.7943	0.0475552	85.58						73.91	0.0472214	0.12114	0.0841809
23	25.175	39.072	1.0904	27.4507	63.2415	24.7943	0.0690942	89.47						77.8	0.0735901	0.149179	0.111385
24	25.76	39.248	1.08551	27.9627	63.2415	24.7943	0.0824092	93.36						81.69	0.0794226	0.111137	0.09528
25	26.419	38.827	1.09728	28.989	63.2415	24.7943	0.109103	97.25						85.58	0.0475552	0.0644764	0.0560158
26	25.844	38.971	1.09322	28.2533	63.2415	24.7943	0.0899672	101.14						89.47	0.0690942	0.0589627	0.0640285
27	24.6	37.716	1.1296	27.7882	63.2415	24.7943	0.0778703	105.03						93.36	0.0824092	0.0455241	0.0639667
28	26.364	39.429	1.08052	28.4869	63.2415	24.7943	0.0960454	108.92						97.25	0.109103	0.101104	0.105103
29	26.571	37.665	1.13113	30.0552	63.2415	24.7943	0.136836	112.81						101.14	0.0899672	0.104625	0.0972963
30	26.2	39.678	1.07374	28.1321	63.2415	24.7943	0.0868155	116.7						105.03	0.0778703	0.0992691	0.0885697
31	26.779	36.691	1.16116	31.0946	63.2415	24.7943	0.16387	120.59						108.92	0.0960454	0.130536	0.113291
32	24.806	39.392	1.08154	26.8287	63.2415	24.7943	0.052914	124.48						112.81	0.136836	0.105525	0.121181
33	25.211	37.522	1.13544	28.6256	63.2415	24.7943	0.0996515	128.37						116.7	0.0868155	0.127103	0.106959
34	25.737	39.522	1.07798	27.744	63.2415	24.7943	0.0767221	132.26						120.59	0.16387	0.21194	0.187905
35	25.131	38.958	1.09359	27.483	63.2415	24.7943	0.069932	136.15						124.48	0.052914	0.0936256	0.0732698
36	26.091	39.147	1.08831	28.395	63.2415	24.7943	0.0936551	140.04						128.37	0.0996515	0.0999909	0.0998212
37	24.632	38.322	1.11174	27.3843	63.2415	24.7943	0.0673663	143.93						132.26	0.0767221	0.156329	0.116526
38	24.131	37.956	1.12246	27.086	63.2415	24.7943	0.0596078	147.82						136.15	0.069932	0.12351	0.0967211
39	27.347	39.817	1.07	29.2612	63.2415	24.7943	0.116182	151.71						140.04	0.0936551	0.122448	0.108052
40	26.179	38.657	1.1021	28.852	63.2415	24.7943	0.105539	155.6						143.93	0.0673663	0.11363	0.0904984
41	25.697	38.238	1.11418	28.6311	63.2415	24.7943	0.0997941	159.49						147.82	0.0596078	0.0603647	0.0599863
42	26.217	37.983	1.12166	29.4066	63.2415	24.7943	0.119964	163.38						151.71	0.116182	0.193468	0.154825
43	25.265	39.697	1.07323	27.1151	63.2415	24.7943	0.0603653	167.27						155.6	0.105539	0.184924	0.145231
44	26.095	37.173	1.1461	29.9075	63.2415	24.7943	0.132993	171.16						159.49	0.0997941	0.054665	0.0772295
45	26.318	38.038	1.12004	29.4772	63.2415	24.7943	0.1218	175.05						163.38	0.119964	0.0977532	0.108859
46	25.082	38.488	1.10694	27.7643	63.2415	24.7943	0.0772503	178.94						167.27	0.0603653	0.14516	0.102763
47	25.101	38.116	1.11775	28.0565	63.2415	24.7943	0.0848506	182.83						171.16	0.132993	0.171059	0.152026
48	23.164	37.985	1.1216	25.9808	63.2415	24.7943	0.0308602	186.72						175.05	0.1218	0.150616	0.136208
49	25.815	38.846	1.09674	28.3124	63.2415	24.7943	0.0915046	190.61						178.94	0.0772503	0.200813	0.139032
50	24.436	37.663	1.13119	27.6418	63.2415	24.7943	0.0740621	194.5						182.83	0.0848506	0.0988949	0.0918727
51	24.762	39.297	1.08415	26.8458	63.2415	24.7943	0.0533602	198.39						186.72	0.0308602	0.186853	0.108857
52	26.225	38.88	1.09578	28.7369	63.2415	24.7943	0.102546	202.28						190.61	0.0915046	0.211478	0.151491
53	25.025	38.644	1.10247	27.5894	63.2415	24.7943	0.0727007	206.17						194.5	0.0740621	0.132788	0.103425
54	25.907	38.663	1.10193	28.5478	63.2415	24.7943	0.097627	210.06						198.39	0.0533602	0.165455	0.109408
55	23.958	39.72	1.07261	25.6975	63.2415	24.7943	0.023494	213.95						202.28	0.102546	0.212914	0.15773
56	24.549	38.844	1.0968	26.9253	63.2415	24.7943	0.0554269	217.84						206.17	0.0727007	0.1591	0.115901
57	25.632	38.787	1.09841	28.1544	63.2415	24.7943	0.0873966	221.73						210.06	0.097627	0.109276	0.103452
58	25.229	38.189	1.11561	28.1457	63.2415	24.7943	0.0871698	225.62						213.95	0.023494	0.130062	0.0767781
59	24.901	36.682	1.16144	28.9211	63.2415	24.7943	0.107336	229.51						217.84	0.0554269	0.120849	0.0881382
60	24.516	40.244	1.05864	25.9537	63.2415	24.7943	0.0301557	233.4						221.73	0.0873966	0.115976	0.101686
61	24.467	39.112	1.08928	26.6515	63.2415	24.7943	0.048305	237.29						225.62	0.0871698	0.136404	0.111787
62	25.956	39.535	1.07763	27.9709	63.2415	24.7943	0.0826231	241.18						229.51	0.107336	0.152767	0.130051
63	25.811	38.211	1.11497	28.7784	63.2415	24.7943	0.103626	245.07						233.4	0.0301557	0.102366	0.066261
64	25.935	39.053	1.09093	28.2932	63.2415	24.7943	0.0910063	248.96						237.29	0.048305	0.183239	0.115772
65	25.878	38.107	1.11801	28.9319	63.2415	24.7943	0.107617	252.85						241.18	0.0826231	0.163475	0.123049
66	24.198	38.987	1.09277	26.443	63.2415	24.7943	0.0428819	256.74						245.07	0.103626	0.250651	0.177139
67	24.497	39.552	1.07716	26.3873	63.2415	24.7943	0.041434	260.63						248.96	0.0910063	0.169815	0.130411
68	24.859	39.48	1.07913	26.8261	63.2415	24.7943	0.0528462	264.52						252.85	0.107617	0.219129	0.163373
69	24.04	39.105	1.08948	26.191	63.2415	24.7943	0.0363293	268.41						256.74	0.0428819	0.197141	0.120012
70	24.931	40.623	1.04877	26.1468	63.2415	24.7943	0.0351782	272.3						260.63	0.041434	0.237906	0.13967
71	24.211	40.029	1.06433	25.7685	63.2415	24.7943	0.0253382	276.19						264.52	0.0528462	0.179794	0.11632
72	24.419	37.714	1.12966	27.5852	63.2415	24.7943	0.0725904	280.08						268.41	0.0363293	0.209732	0.123031
73	25.838	39.869	1.0686	27.6105	63.2415	24.7943	0.0732487	283.97						272.3	0.0351782	0.122907	0.0790426
74	24.669	38.512	1.10625	27.2901	63.2415	24.7943	0.0649169	287.86						276.19	0.0253382	0.160671	0.0930045
75	24.888	40.105	1.06231	26.4388	63.2415	24.7943	0.0427739	291.75						280.08	0.0725904	0.230374	0.151482
76	24.594	41.053	1.03778	25.5232	63.2415	24.7943	0.0189585	295.64						283.97	0.0732487	0.160697	0.116973
77	25.472	39.608	1.07564	27.3987	63.2415	24.7943	0.0677413	299.53						287.86	0.0649169	0.178915	0.121916
78	25.215	40.488	1.05226	26.5328	63.2415	24.7943	0.0452185	303.42						291.75	0.0427739	0.162268	0.102521
79	25.621	39.952	1.06638	27.3217	63.2415	24.7943	0.065738	307.31						295.64	0.0189585	0.203466	0.111212
80	25.166	40.377	1.05516	26.554	63.2415	24.7943	0.0457709	311.2						299.53	0.0677413	0.192458	0.1301
81	24.747	38.244	1.114	27.5683	63.2415	24.7943	0.0721511	315.09						303.42	0.0452185	0.116552	0.0808853
82	26.328	39.985	1.0655	28.0525	63.2415	24.7943	0.0847448	318.98						307.31	0.065738	0.108778	0.0872578
83	25.564	38.638	1.10265	28.188	63.2415	24.7943	0.0882703	322.87						311.2	0.0457709	0.132338	0.0890542
84	26.888	39.642	1.07472	28.897	63.2415	24.7943	0.106712	326.76						315.09	0.0721511	0.166657	0.119404
85	26.354	38.781	1.09858	28.952	63.2415	24.7943	0.10814	330.65						318.98	0.0847448	0.21029	0.147517
86	25.276	39.891	1.06801	26.995	63.2415	24.7943	0.0572411	334.54						322.87	0.0882703	0.252635	0.170452
87	24.838	38.943	1.09401	27.173	63.2415	24.7943	0.06187	338.43						326.76	0.106712	0.255867	0.181289
88	26.785	36.821	1.15706	30.9918	63.2415	24.7943	0.161195	342.32						330.65	0.10814	0.204537	0.156339
89	25.411	39.272	1.08484	27.567	63.2415	24.7943	0.0721172	346.21						334.54	0.0572411	0.206975	0.132108
90	24.558	38.819	1.0975	26.9525	63.2415	24.7943	0.0561348	350.1						338.43	0.06187	0.151552	0.106711
91	25.615	38.063	1.1193	28.6709	63.2415	24.7943	0.100831	353.99						342.32	0.161195	0.160923	0.161059
92	25.463	39.684	1.07358	27.3366	63.2415	24.7943	0.0661252	357.88						346.21	0.0721172	0.285081	0.178599
93	23.267	39.366	1.08225	25.1808	63.2415	24.7943	0.0100535	361.77						350.1	0.0561348	0.211664	0.133899
94	25.691	38.743	1.09966	28.2513	63.2415	24.7943	0.0899158	365.66						353.99	0.100831	0.127523	0.114177
95	24.747	39.354	1.08258	26.7907	63.2415	24.7943	0.0519265	369.55						357.88	0.0661252	0.226126	0.146125
96	26.261	39.436	1.08033	28.3706	63.2415	24.7943	0.0930197	373.44						361.77	0.0100535	0.109066	0.0595595
97	27.004	37.943	1.12284	30.3212	63.2415	24.7943	0.143754	377.33						365.66	0.0899158	0.199378	0.144647
98	27.015	38.526	1.10585	29.8746	63.2415	24.7943	0.132137	381.22						369.55	0.0519265	0.179887	0.115907
99	24.829	38.505	1.10645	27.4721	63.2415	24.7943	0.0696505	385.11						373.44	0.0930197	0.15713	0.125075
100	25.488	40.204	1.0597	27.0095	63.2415	24.7943	0.057618	389						377.33	0.143754	0.22666	0.185207
101	25.558	39.998	1.06515	27.2232	63.2415	24.7943	0.0631754	392.89						381.22	0.132137	0.210137	0.171137
102	25.112	38.741	1.09971	27.616	63.2415	24.7943	0.0733924	396.78						385.11	0.0696505	0.148971	0.109311
103	23.713	30.203	1.41059	33.4493	63.2415	24.7943	0.225114	400.67						389	0.057618	0.18879	0.123204
														392.89	0.0631754	0.190761	0.126968
Measurement B														396.78	0.0733924	0.135235	0.104314
	Bleached	Unbleached												400.67	0.225114	0.171383	0.198249
Frame	mean_I(t)	mean_R(t)	C(t)	Icorrect(t)	Icorrect(0)	min_Icorrect(t)	Inorm(t)	Time (s)
1	36.445	30.826	1.38208	50.3699	50.3699	16.1621	1	3.89
2	33.809	30.985	1.37499	46.487	50.3699	16.1621	0.886489	7.78
3	12.309	32.447	1.31303	16.1621	50.3699	16.1621	0	11.67
4	13.318	33.553	1.26975	16.9106	50.3699	16.1621	0.021879	15.56
5	12.491	31.008	1.37397	17.1622	50.3699	16.1621	0.0292362	19.45
6	13.245	32.053	1.32917	17.6049	50.3699	16.1621	0.0421768	23.34
7	14.655	32.303	1.31889	19.3283	50.3699	16.1621	0.0925566	27.23
8	16.1	32.091	1.3276	21.3744	50.3699	16.1621	0.15237	31.12
9	15.773	31.462	1.35414	21.3589	50.3699	16.1621	0.151917	35.01
10	16.018	30.78	1.38415	22.1712	50.3699	16.1621	0.175665	38.9
11	13.473	32.727	1.3018	17.5391	50.3699	16.1621	0.0402545	42.79
12	13.309	31.008	1.37397	18.2861	50.3699	16.1621	0.0620914	46.68
13	14.9	33.121	1.28631	19.1661	50.3699	16.1621	0.0878147	50.57
14	14.4	30.144	1.41335	20.3522	50.3699	16.1621	0.12249	54.46
15	15.745	30.803	1.38311	21.7771	50.3699	16.1621	0.164143	58.35
16	15.091	33.061	1.28865	19.447	50.3699	16.1621	0.0960267	62.24
17	16.536	32.977	1.29193	21.3634	50.3699	16.1621	0.152048	66.13
18	15.182	32.523	1.30997	19.8879	50.3699	16.1621	0.108916	70.02
19	15.873	33.303	1.27928	20.3061	50.3699	16.1621	0.12114	73.91
20	15.318	30.689	1.38825	21.2652	50.3699	16.1621	0.149179	77.8
21	15.382	32.826	1.29787	19.9639	50.3699	16.1621	0.111137	81.69
22	14.1	32.705	1.30268	18.3677	50.3699	16.1621	0.0644764	85.58
23	14.818	34.727	1.22683	18.1791	50.3699	16.1621	0.0589627	89.47
24	12.909	31.038	1.37264	17.7194	50.3699	16.1621	0.0455241	93.36
25	14.873	32.295	1.31921	19.6207	50.3699	16.1621	0.101104	97.25
26	14.336	30.939	1.37703	19.7411	50.3699	16.1621	0.104625	101.14
27	14.791	32.22	1.32228	19.5579	50.3699	16.1621	0.0992691	105.03
28	14.327	29.591	1.43976	20.6275	50.3699	16.1621	0.130536	108.92
29	15.009	32.341	1.31734	19.7719	50.3699	16.1621	0.105525	112.81
30	14.891	30.932	1.37734	20.51	50.3699	16.1621	0.127103	116.7
31	16.382	29.811	1.42914	23.4121	50.3699	16.1621	0.21194	120.59
32	14.655	32.242	1.32138	19.3649	50.3699	16.1621	0.0936256	124.48
33	14.618	31.803	1.33962	19.5826	50.3699	16.1621	0.0999909	128.37
34	16.355	32.394	1.31518	21.5098	50.3699	16.1621	0.156329	132.26
35	15.9	33.227	1.28221	20.3871	50.3699	16.1621	0.12351	136.15
36	14.891	31.174	1.36665	20.3508	50.3699	16.1621	0.122448	140.04
37	15.091	32.068	1.32855	20.0492	50.3699	16.1621	0.11363	143.93
38	13.927	32.553	1.30876	18.2271	50.3699	16.1621	0.0603647	147.82
39	16.227	30.348	1.40385	22.7803	50.3699	16.1621	0.193468	151.71
40	16.127	30.553	1.39443	22.488	50.3699	16.1621	0.184924	155.6
41	14.291	33.765	1.26178	18.0321	50.3699	16.1621	0.054665	159.49
42	14.391	31.432	1.35543	19.5061	50.3699	16.1621	0.0977532	163.38
43	14.791	29.826	1.42842	21.1277	50.3699	16.1621	0.14516	167.27
44	15.791	30.561	1.39406	22.0137	50.3699	16.1621	0.171059	171.16
45	15.509	31	1.37432	21.3144	50.3699	16.1621	0.150616	175.05
46	15.927	29.462	1.44607	23.0315	50.3699	16.1621	0.200813	178.94
47	14.173	30.894	1.37904	19.5451	50.3699	16.1621	0.0988949	182.83
48	15.745	29.742	1.43245	22.554	50.3699	16.1621	0.186853	186.72
49	16.891	30.758	1.38514	23.3963	50.3699	16.1621	0.211478	190.61
50	15.091	31.053	1.37198	20.7045	50.3699	16.1621	0.132788	194.5
51	15.591	30.439	1.39965	21.822	50.3699	16.1621	0.165455	198.39
52	16.555	30.083	1.41622	23.4454	50.3699	16.1621	0.212914	202.28
53	15.136	29.848	1.42737	21.6046	50.3699	16.1621	0.1591	206.17
54	15.609	33.417	1.27492	19.9002	50.3699	16.1621	0.109276	210.06
55	16.009	33.091	1.28748	20.6113	50.3699	16.1621	0.130062	213.95
56	14.891	31.258	1.36298	20.2961	50.3699	16.1621	0.120849	217.84
57	15.055	31.864	1.33706	20.1294	50.3699	16.1621	0.115976	221.73
58	15.518	31.742	1.3422	20.8282	50.3699	16.1621	0.136404	225.62
59	15.182	30.242	1.40877	21.3879	50.3699	16.1621	0.152767	229.51
60	16.109	34.902	1.22068	19.6639	50.3699	16.1621	0.102366	233.4
61	15.655	29.735	1.43279	22.4303	50.3699	16.1621	0.183239	237.29
62	15.682	30.712	1.38721	21.7542	50.3699	16.1621	0.163475	241.18
63	17.009	29.295	1.45431	24.7364	50.3699	16.1621	0.250651	245.07
64	16.155	31.326	1.36002	21.9711	50.3699	16.1621	0.169815	248.96
65	17.673	31.826	1.33865	23.658	50.3699	16.1621	0.219129	252.85
66	16.545	30.773	1.38446	22.9059	50.3699	16.1621	0.197141	256.74
67	16.355	28.674	1.48581	24.3004	50.3699	16.1621	0.237906	260.63
68	15.291	29.197	1.45919	22.3125	50.3699	16.1621	0.179794	264.52
69	16.964	30.97	1.37565	23.3366	50.3699	16.1621	0.209732	268.41
70	15.109	31.606	1.34797	20.3665	50.3699	16.1621	0.122907	272.3
71	15.682	30.848	1.38109	21.6583	50.3699	16.1621	0.160671	276.19
72	17.909	31.735	1.34249	24.0427	50.3699	16.1621	0.230374	280.08
73	15.764	31.008	1.37397	21.6592	50.3699	16.1621	0.160697	283.97
74	16.364	31.288	1.36167	22.2824	50.3699	16.1621	0.178915	287.86
75	15.718	30.841	1.38141	21.713	50.3699	16.1621	0.162268	291.75
76	16.882	31.106	1.36964	23.1223	50.3699	16.1621	0.203466	295.64
77	16.409	30.735	1.38617	22.7457	50.3699	16.1621	0.192458	299.53
78	15.109	31.947	1.33358	20.1491	50.3699	16.1621	0.116552	303.42
79	14.273	30.583	1.39306	19.8832	50.3699	16.1621	0.108778	307.31
80	14.127	29.091	1.46451	20.6891	50.3699	16.1621	0.132338	311.2
81	15.255	29.727	1.43318	21.8631	50.3699	16.1621	0.166657	315.09
82	14.955	27.28	1.56173	23.3557	50.3699	16.1621	0.21029	318.98
83	17.391	29.871	1.42627	24.8042	50.3699	16.1621	0.252635	322.87
84	17.327	29.629	1.43792	24.9148	50.3699	16.1621	0.255867	326.76
85	16.6	30.538	1.39511	23.1589	50.3699	16.1621	0.204537	330.65
86	15.8	28.962	1.47103	23.2423	50.3699	16.1621	0.206975	334.54
87	15.145	30.227	1.40947	21.3464	50.3699	16.1621	0.151552	338.43
88	14.991	29.477	1.44533	21.6669	50.3699	16.1621	0.160923	342.32
89	17.727	29.144	1.46184	25.9141	50.3699	16.1621	0.285081	346.21
90	16.009	29.144	1.46184	23.4027	50.3699	16.1621	0.211664	350.1
91	15.164	31.477	1.3535	20.5244	50.3699	16.1621	0.127523	353.99
92	16.118	28.735	1.48265	23.8974	50.3699	16.1621	0.226126	357.88
93	14.627	31.326	1.36002	19.893	50.3699	16.1621	0.109066	361.77
94	16.118	29.879	1.42588	22.9824	50.3699	16.1621	0.199378	365.66
95	16.555	31.606	1.34797	22.3157	50.3699	16.1621	0.179887	369.55
96	16.391	32.424	1.31396	21.5372	50.3699	16.1621	0.15713	373.44
97	16.109	28.697	1.48462	23.9157	50.3699	16.1621	0.22666	377.33
98	15.309	27.932	1.52528	23.3504	50.3699	16.1621	0.210137	381.22
99	14.527	29.114	1.46335	21.2581	50.3699	16.1621	0.148971	385.11
100	15.864	29.879	1.42588	22.6202	50.3699	16.1621	0.18879	389

## Sheet: Figure S3
PEGylated SUV size determination
diameter (nm)	Record 1: SUV 100 nm 1	Record 2: SUV 100 nm 1	Record 3: SUV 100 nm 2	average	stdev
0.4	0	0	0	0	0
0.463	0	0	0	0	0
0.536	0	0	0	0	0
0.621	0	0	0	0	0
0.719	0	0	0	0	0
0.833	0	0	0	0	0
0.965	0	0	0	0	0
1.12	0	0	0	0	0
1.29	0	0	0	0	0
1.5	0	0	0	0	0
1.74	0	0	0	0	0
2.01	0	0	0	0	0
2.33	0	0	0	0	0
2.7	0	0	0	0	0
3.12	0	0	0	0	0
3.62	0	0	0	0	0
4.19	0	0	0	0	0
4.85	0	0	0	0	0
5.61	0	0	0	0	0
6.5	0	0	0	0	0
7.53	0	0	0	0	0
8.72	0	0	0	0	0
10.1	0	0	0	0	0
11.7	0	0	0	0	0
13.5	0	0	0	0	0
15.7	0	0	0	0	0
18.2	0	0	0	0	0
21	0	0	0	0	0
24.4	0	0	0	0	0
28.2	0	0	0	0	0
32.7	0	0	0	0	0
37.8	0	0	0	0	0
43.8	0	0	0	0	0
50.7	3.23	3.06	2.56	2.95	0.348281
58.8	12	11.7	10.4	11.3667	0.85049
68.1	19.7	19.8	18.8	19.4333	0.550757
78.8	20.6	21	21	20.8667	0.23094
91.3	16.6	16.8	17.4	16.9333	0.416333
106	11.4	11.5	12.2	11.7	0.43589
122	7.11	7.07	7.66	7.28	0.329697
142	4.18	4.11	4.51	4.26667	0.21362
164	2.37	2.31	2.56	2.41333	0.130512
190	1.33	1.29	1.43	1.35	0.072111
220	0.742	0.72	0.791	0.751	0.0363456
255	0.397	0.389	0.419	0.401667	0.0155349
295	0.182	0.182	0.188	0.184	0.0034641
342	0.0597	0.0636	0.06	0.0611	0.00217025
396	0.0113	0.0139	0.0104	0.0118667	0.00181751
459	0.000578	0.00129	0.00027	0.000712667	0.000523165
531	0	0	0	0	0
615	0	0	0	0	0
712	0	0	0	0	0
825	0	0	0	0	0
955	0	0	0	0	0
1110	0	0	0	0	0
1280	0	0	0	0	0
1480	0	0	0	0	0
1720	0	0	0	0	0
1990	0	0	0	0	0
2300	0	0	0	0	0
2670	0	0	0	0	0
3090	0	0	0	0	0
3580	0	0	0	0	0
4150	0	0	0	0	0
4800	0	0	0	0	0
5560	0	0	0	0	0
6440	0	0	0	0	0
7460	0	0	0	0	0
8630	0	0	0	0	0
non-PEGylated SUV size determination
diameter (nm)	Record 219: SUV 100nm 1	Record 220: SUV 100nm 2	Record 221: SUV 100nm 3	average	stdev
0.4	0	0	0	0	0
0.463	0	0	0	0	0
0.536	0	0	0	0	0
0.621	0	0	0	0	0
0.719	0	0	0	0	0
0.833	0	0	0	0	0
0.965	0	0	0	0	0
1.12	0	0	0	0	0
1.29	0	0	0	0	0
1.5	0	0	0	0	0
1.74	0	0	0	0	0
2.01	0	0	0	0	0
2.33	0	0	0	0	0
2.7	0	0	0	0	0
3.12	0	0	0	0	0
3.62	0	0	0	0	0
4.19	0	0	0	0	0
4.85	0	0	0	0	0
5.61	0	0	0	0	0
6.5	0	0	0	0	0
7.53	0	0	0	0	0
8.72	0	0	0	0	0
10.1	0	0	0	0	0
11.7	0	0	0	0	0
13.5	0	0	0	0	0
15.7	0	0	0	0	0
18.2	0	0	0	0	0
21	0	0	0	0	0
24.4	0	0	0	0	0
28.2	0	0	0	0	0
32.7	0	0	0	0	0
37.8	0	0	0	0	0
43.8	0	0	0	0	0
50.7	0	0	0	0	0
58.8	1.28	0	2.07	1.11667	1.04462
68.1	6.47	0	9.03	5.16667	4.65395
78.8	14	2.61	17.1	11.2367	7.63001
91.3	18	9.94	19.6	15.8467	5.1775
106	16.9	17	16.6	16.8333	0.208167
122	13.3	18.6	11.9	14.6	3.53412
142	9.61	16.1	7.95	11.22	4.30694
164	6.67	12.2	5.17	8.01333	3.70252
190	4.64	8.75	3.43	5.60667	2.78863
220	3.33	6.15	2.4	3.96	1.95277
255	2.43	4.2	1.76	2.79667	1.26065
295	1.65	2.55	1.24	1.81333	0.670099
342	0.977	1.27	0.792	1.013	0.241025
396	0.497	0.485	0.463	0.481667	0.0172434
459	0.215	0.129	0.253	0.199	0.0635295
531	0.0742	0.0178	0.13	0.074	0.0561003
615	0.0171	0	0.0581	0.0250667	0.0298581
712	0.00176	0	0.0211	0.00762	0.0117071
825	0	0	0.00563	0.00187667	0.00325048
955	0	0	0.000817	0.000272333	0.000471695
1110	0	0	1.9e-06	6.33333e-07	1.09697e-06
1280	0	0	0	0	0
1480	0	0	0	0	0
1720	0	0	0	0	0
1990	0	0	2.01e-05	6.7e-06	1.16047e-05
2300	0	0	9.52e-05	3.17333e-05	5.49637e-05
2670	0	0	0.000209	6.96667e-05	0.000120666
3090	0	0	0.0003	0.0001	0.000173205
3580	2.3e-05	5.57e-05	0.000342	0.000140233	0.000175498
4150	0.000101	0.000237	0.000346	0.000228	0.000122748
4800	0.000213	0.000479	0.000322	0.000338	0.00013372
5560	0.000213	0.00047	0.000221	0.000301333	0.000146124
6440	7.91e-05	0.000172	6.96e-05	0.0001069	5.6578e-05
7460	0	0	0	0	0
8630	0	0	0	0	0
